# Supplementary material for: Acid–base sites synergistic catalysis over Mg–Zr–Al mixed metal oxide toward synthesis of diethyl carbonate
Source: PubMed Central journal article supplement (PMC9077746; doi:10.1039/c7ra13629c), 2018-01-26
Supplement: RA-008-C7RA13629C-s001.pdf [file RA-008-C7RA13629C-s001.pdf]

## Supporting Information for

# Acid-Base Sites Synergistic Catalysis over Mg-Zr-Al Mixed Metal Oxide toward Synthesis of Diethyl Carbonate

**Tingting Yan, Weihan Bing, Ming Xu, Yinwen Li, Yusen Yang, Guoqing Cui, Lan Yang\***  
**and Min Wei\***

*State Key Laboratory of Chemical Resource Engineering, Beijing Advanced Innovation Center  
for Soft Matter Science and Engineering, Beijing University of Chemical Technology, Beijing  
100029, P. R. China*

### CORRESPONDING AUTHOR FOOTNOTE

\* Corresponding authors. Phone: +86-10-64412131. Fax: +86-10-64425385. E-mail:  
yanglan@mail.buct.edu.cn; weimin@mail.buct.edu.cn.

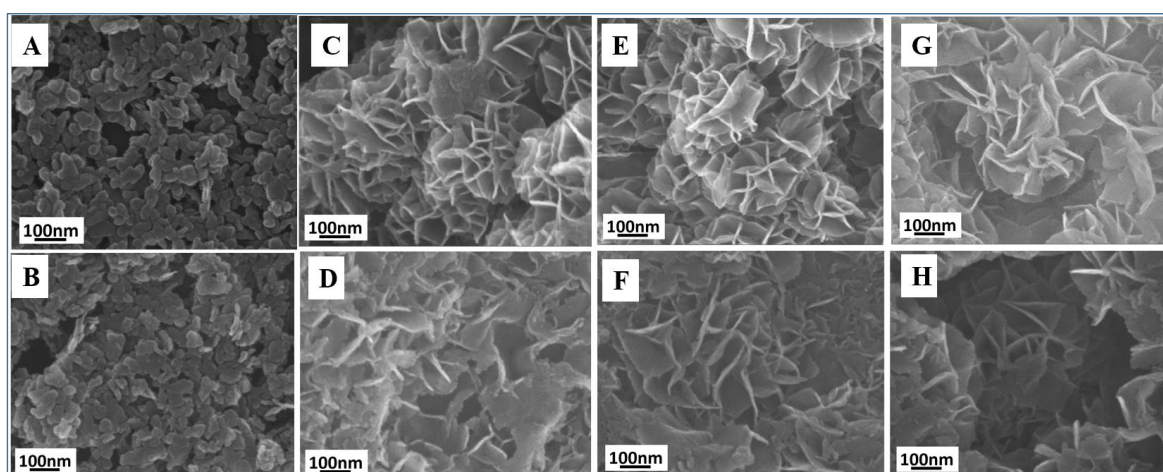

**Figure S1.** SEM images of (A)  $\text{Mg}_2\text{Al-LDH}$ , (B)  $\text{Mg}_2\text{Al-MMO}$ , (C)  $\text{Mg}_2\text{Zr}_{0.22}\text{Al}_{0.78}\text{-LDH}$ , (D)  $\text{Mg}_2\text{Zr}_{0.22}\text{Al}_{0.78}\text{-MMO}$ , (E)  $\text{Mg}_2\text{Zr}_{0.33}\text{Al}_{0.67}\text{-LDH}$ , (F)  $\text{Mg}_2\text{Zr}_{0.33}\text{Al}_{0.67}\text{-MMO}$ , (G)  $\text{Mg}_2\text{Zr}_{0.67}\text{Al}_{0.33}\text{-LDH}$ , (H)  $\text{Mg}_2\text{Zr}_{0.67}\text{Al}_{0.33}\text{-MMO}$ .

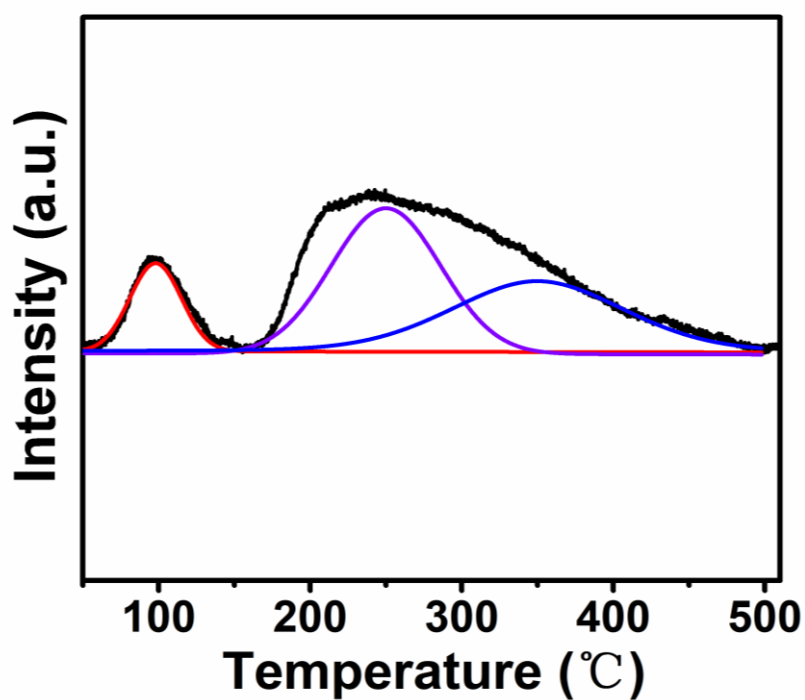

**Figure S2.**  $\text{NH}_3$ -TPD profiles of  $\text{Mg}_2\text{Al-MMO}$  sample.

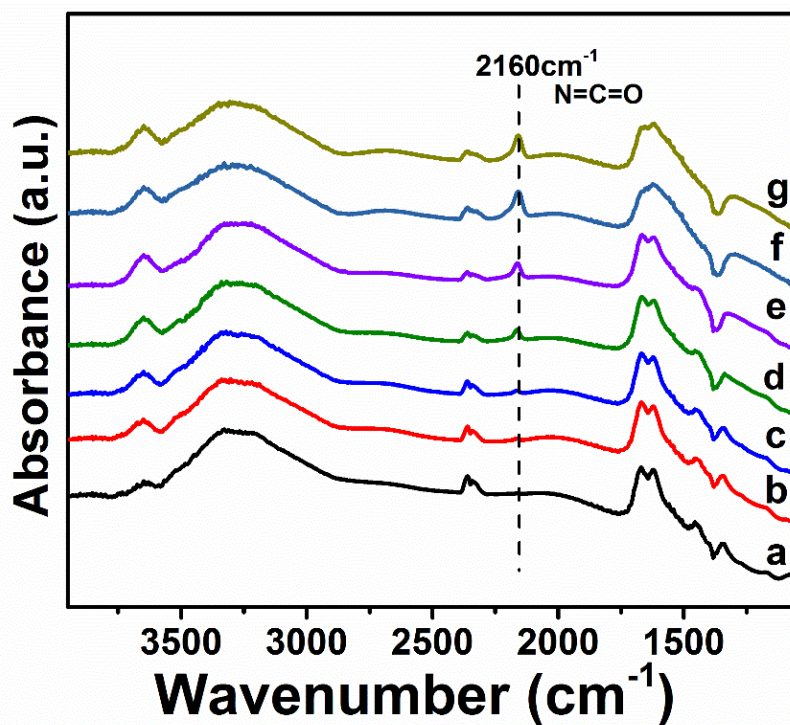

**Figure S3.** *In situ* FTIR spectra evolution of urea over  $\text{Mg}_2\text{Al-MMO}$  sample at: (a) 30 °C, (b) 100 °C, (c) 130 °C, (d) 150 °C, (e) 180 °C, (f) 200 °C, (g) 210 °C, respectively.

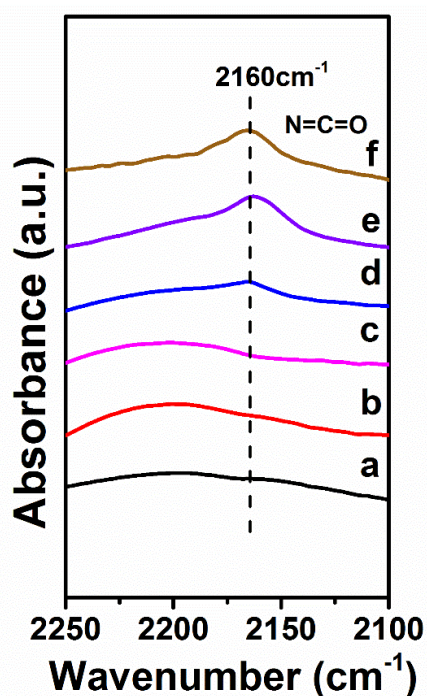

**Figure S4.** *In situ* FTIR spectra evolution of EC over  $\text{Mg}_2\text{Al-MMO}$  sample at: (a) 100 °C, (b) 120 °C, (c) 150 °C, (d) 180 °C, (e) 200 °C, (f) 210 °C, respectively.

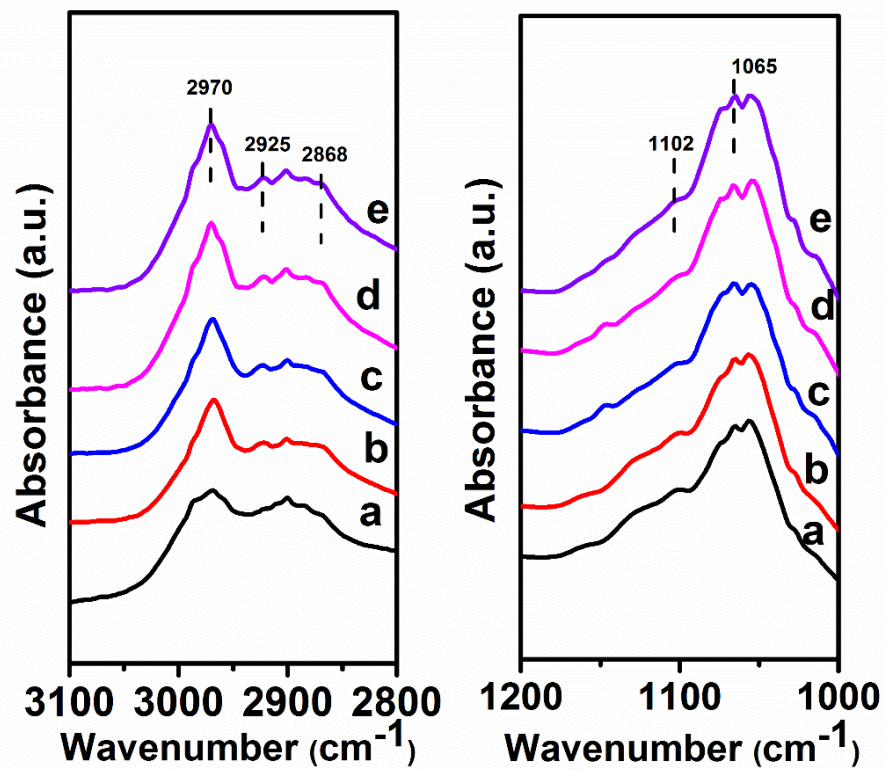

**Figure S5.** *In situ* FTIR spectra evolution of ethanol over Mg<sub>2</sub>Al-MMO sample at: (a) 100 °C, (b) 120 °C, (c) 150 °C, (d) 180 °C, (e) 200 °C, respectively.
